# Supplementary material for: Ambient BTEX Concentrations during the COVID-19 Lockdown in a Peri-Urban Environment (Orléans, France)
Source: MDPI journal article supplement (doi:10.3390/atmos13010010), 2021-12-21
Supplement: s1 [file s1]

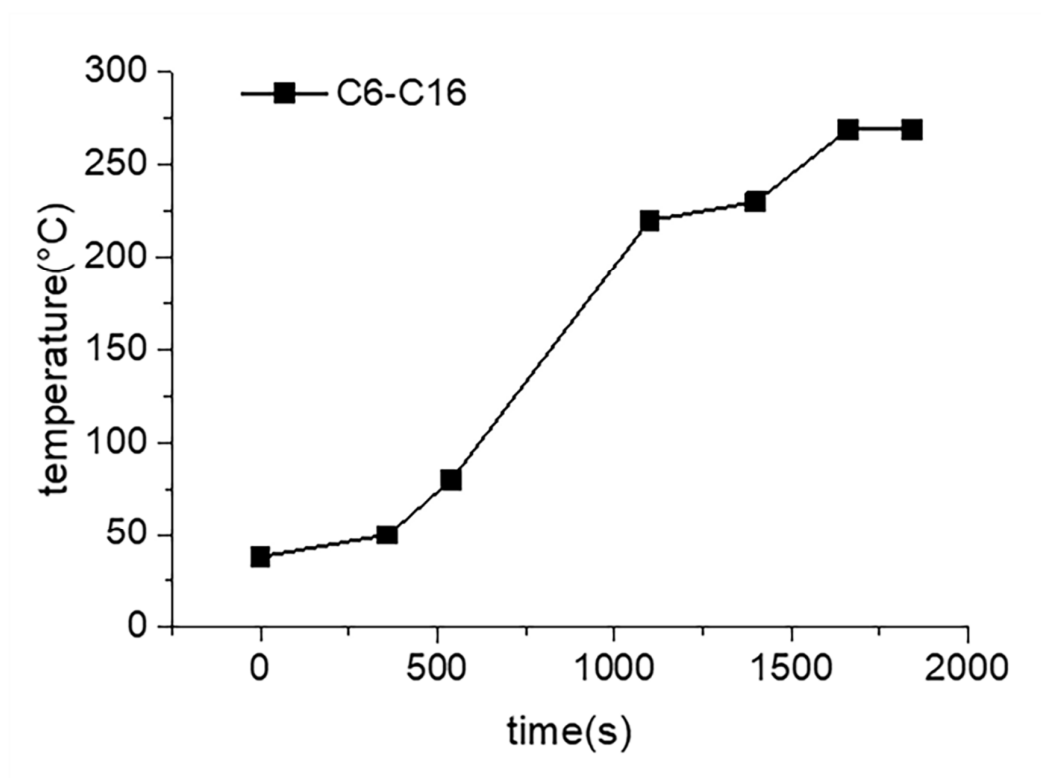

**Figure S1.** The temperature ramp of the capillary column.

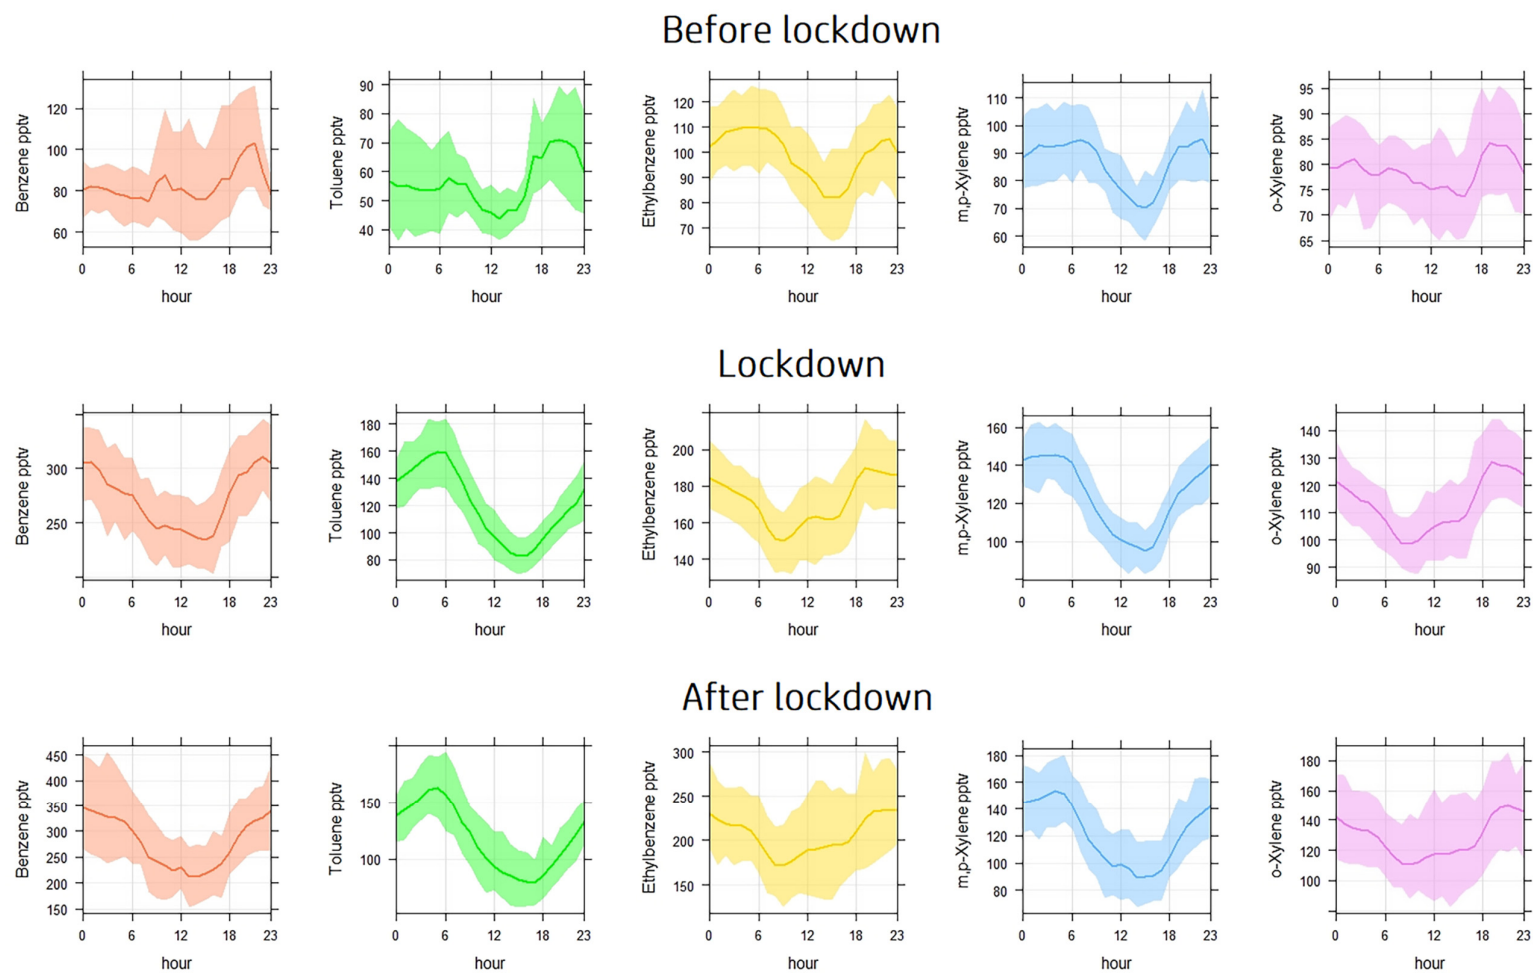

**Figure S2.** A series of diurnal variations in benzene, toluene, ethylbenzene, m,p-xylene and o-xylene mixing ratios before, during and after lockdown provided in the supporting information.
